# Supplementary material for: Cobalt and nickel with various morphologies: mineralizer-assisted synthesis, formation mechanism, and magnetic properties
Source: Royal Society of Chemistry journal article supplement (doi:10.1039/c0ce00074d), 2010-09-06

## Supplementary Information

### Cobalt and nickel with various morphologies: mineralizer-assisted synthesis, formation mechanism, and magnetic properties

Feng Cao,<sup>a,b</sup> Ruiping Deng,<sup>a,b</sup> Jinkui Tang,<sup>a,b</sup> Shuyan Song,<sup>a,b</sup> Yongqian Lei,<sup>a,b</sup> and Hongjie Zhang\*<sup>a</sup>

Table. 1 The influence of different salts on the morphologies of the product.

| NO. | Salts                                           | Morphology             |
|-----|-------------------------------------------------|------------------------|
| a   | Na <sub>2</sub> SO <sub>4</sub>                 | flowers                |
| b   | K <sub>2</sub> SO <sub>4</sub>                  | flowers                |
| c   | (NH <sub>4</sub> ) <sub>2</sub> SO <sub>4</sub> | rods and particles     |
| d   | NaCl                                            | rough spheres          |
| e   | KCl                                             | rough spheres          |
| f   | NH <sub>4</sub> Cl                              | irregular aggregations |
| g   | NaNO <sub>3</sub>                               | assembly spheres       |
| h   | KNO <sub>3</sub>                                | assembly spheres       |
| i   | NH <sub>4</sub> NO <sub>3</sub>                 | microspheres           |
| j   | NaF                                             | network-like spheres   |
| k   | KF                                              | network-like spheres   |
| l   | NH <sub>4</sub> F                               | irregular aggregations |

Fig. S1 SEM images of Ni samples with different amounts of NaOH keeping the other conditions unchanged: (a)  $0.5 \text{ mol}\cdot\text{L}^{-1}$ ; (b)  $2 \text{ mol}\cdot\text{L}^{-1}$ ; (c)  $3 \text{ mol}\cdot\text{L}^{-1}$  and (d)  $5 \text{ mol}\cdot\text{L}^{-1}$ .

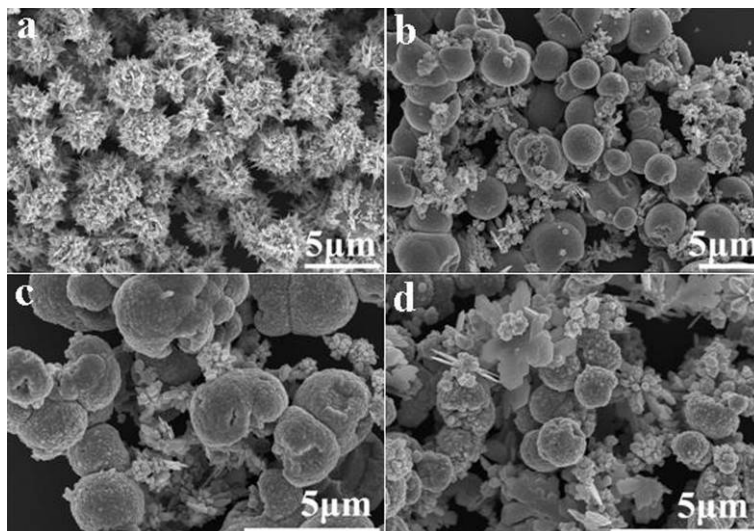

Fig. S2 SEM images of the samples obtained at different addition of reducing agents: (a)  $\text{NaBH}_4$  and (b)  $\text{NaH}_2\text{PO}_2$ .

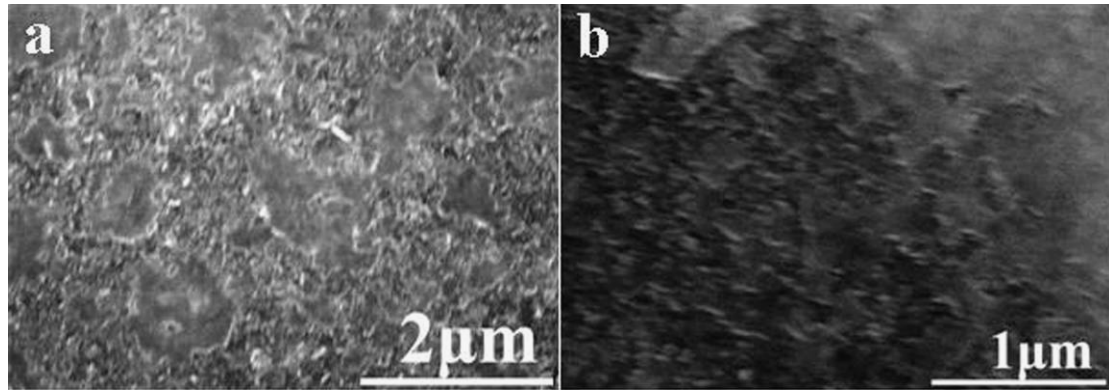

Fig. S3 SEM image of the sample Co obtained without addition of  $\text{Na}_2\text{SO}_4$ .

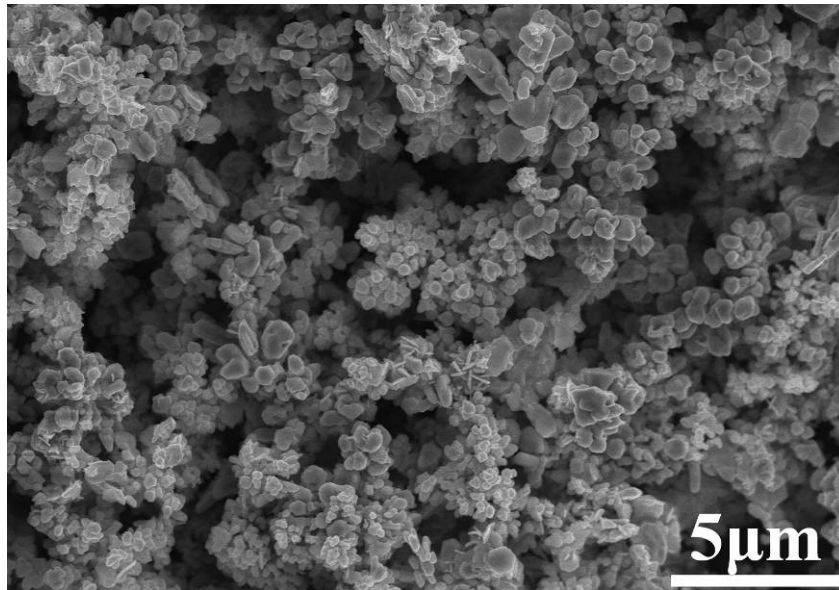

Supplement: c0ce00074d.pdf [file c0ce00074d.pdf]
